# Supplementary material for: Investigation of Health-Related Quality of Life, Anxiety and Satisfaction in Patients with Pulmonary Embolism
Source: MDPI journal article supplement (doi:10.3390/jpm14040393), 2024-04-08
Supplement: s1 [file s1]

Supplementary Figure S1

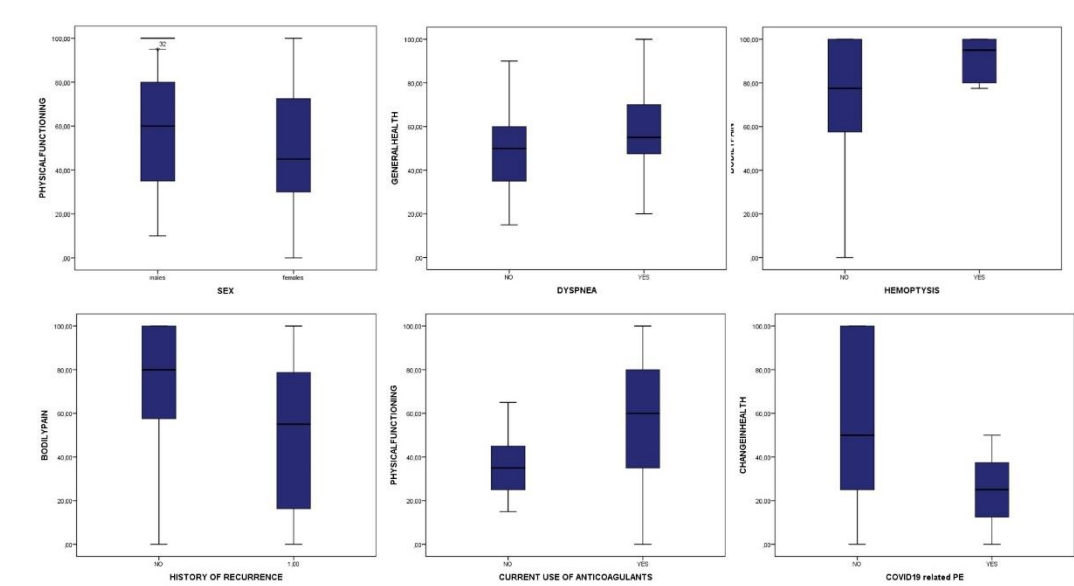

Supplementary Figure S2

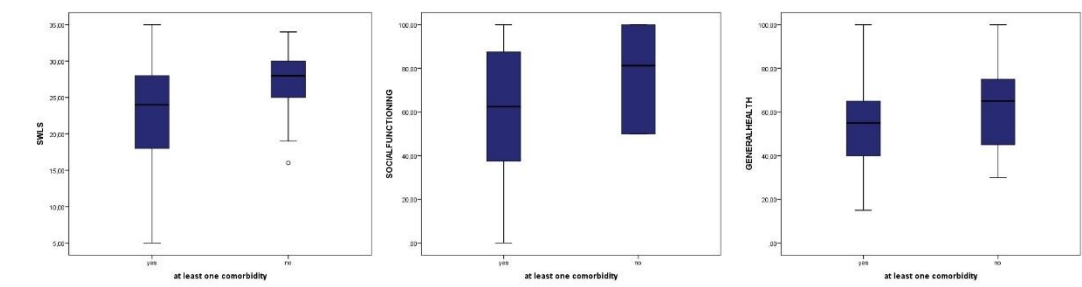

Supplementary Figure S3

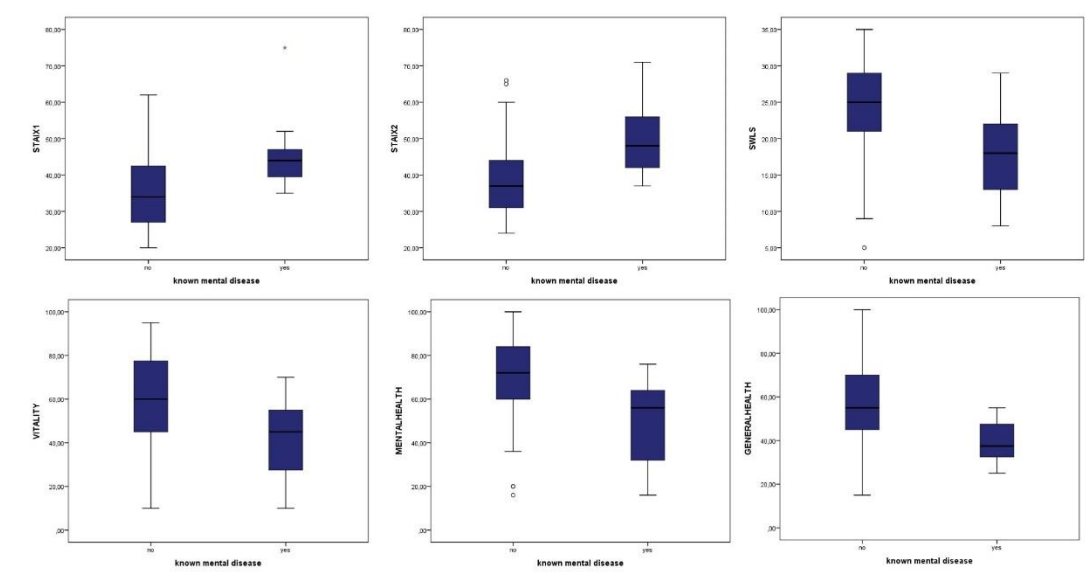

Supplementary Figure S4

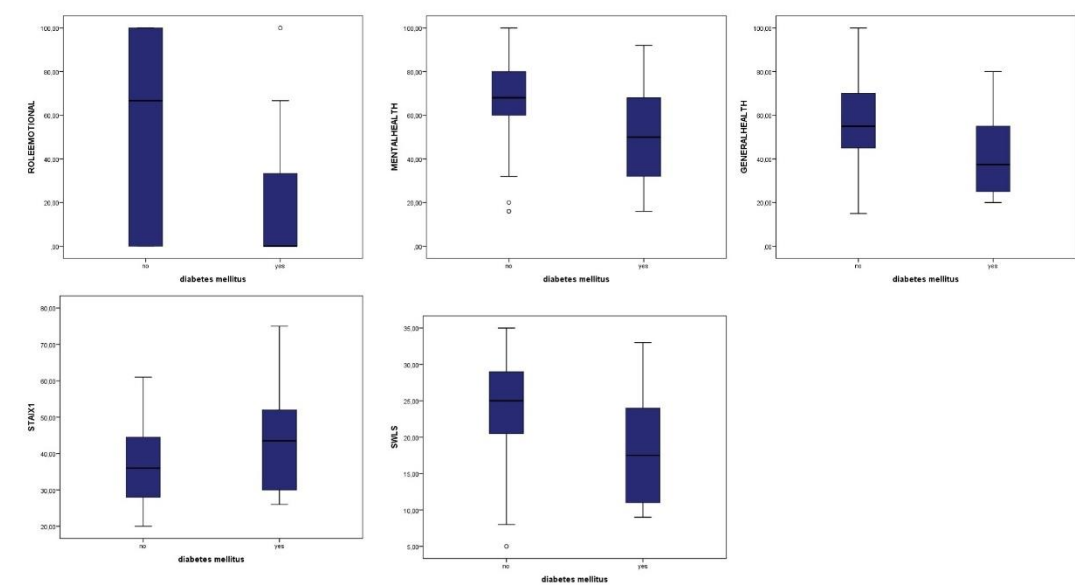

Supplementary Figure S5

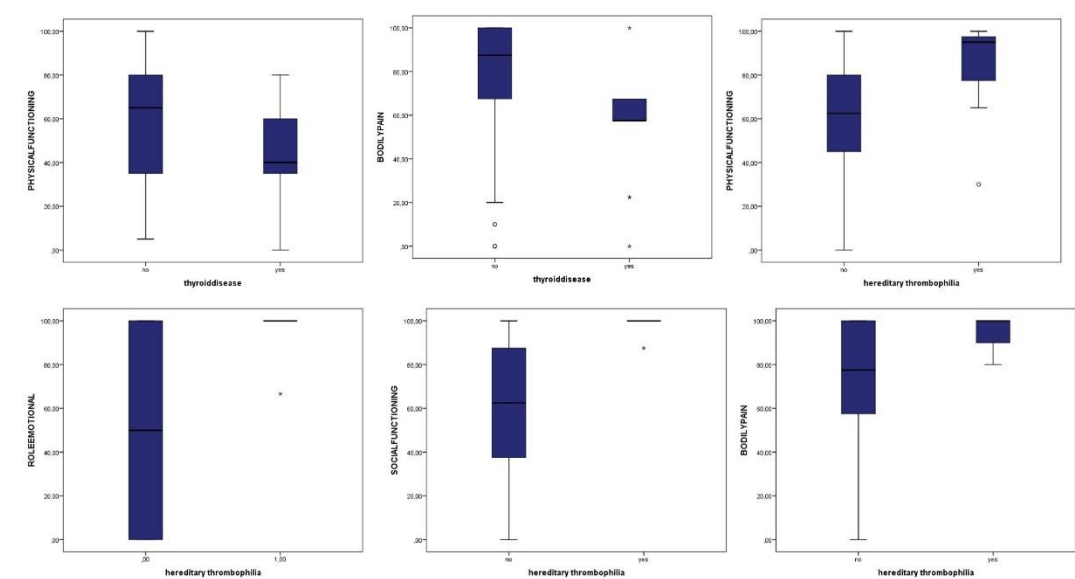

Supplementary Table S1

| Dimension                  | Cronbach's alpha |
|----------------------------|------------------|
| SF36 Physical functioning  | 0.92             |
| Social role functioning    | 0.80             |
| Role physical functioning  | 0.90             |
| Emotional role             | 0.85             |
| Vitality                   | 0.91             |
| Mental health              | 0.89             |
| Body pain                  | 0.86             |
| General health perceptions | 0.90             |
| STAIX1                     | 0.85             |
| STAIX2                     | 0.91             |
| SWLS                       | 0.86             |

**Supplementary Table S2. Patient symptoms at diagnosis.**

| <b>Symptom at PE diagnosis</b> | <b>Percentage (%)</b> |
|--------------------------------|-----------------------|
| Dyspnea                        | 52,2 %                |
| Cough                          | 8,7%                  |
| Hemoptysis                     | 6,5%                  |
| Chest pain                     | 32,6%                 |
| Other                          | 51,1%                 |
